# Supplementary material for: An automated system for interrogating the evolution of microbial endosymbiosis
Source: Royal Society of Chemistry journal article supplement (doi:10.1039/d2lc00602b), 2022-10-08
Supplement: d2lc00602b3.xlsx [file d2lc00602b3.xlsx]

## Sheet: Sheet4
	Gen 10										Gen 20										Gen 25
#Samples	PE1	PE2	PE3	PE4	PE5	PE6	PE7	PE8	Sum	% mutation	PE9	PE10	PE11	PE12	PE13	PE14	PE15	PE16	Sum	% mutation	PE17	PE18	PE19	PE20	PE21	PE22	PE23	PE24	Sum	% mutation	Contig	Pos	Ref	Var	Score	Var_cov	Var_frac	Type	Ref_nt	Var_nt	Ref_nt_pos_change	Ref_aa_pos_change	Frameshift	Gene_ID	Function	Upstream_feature	Downstream_feature	snpEff_type	snpEff_impact
1									0	0			PE11						1	12.5									0	0	562.43589.con.0001	111932	G	T	33.3247	3	0.5	Nonsyn	gct	gAt	107C>A	Ala36Asp		fig|562.43589.peg.101	Replication-associated recombination protein RarA	Seryl-tRNA synthetase (EC 6.1.1.11)	Outer membrane lipoprotein carrier protein LolA	missense_variant	MODERATE
1									0	0	PE9								1	12.5									0	0	562.43589.con.0001	170655	G	T	26.1329	2	0.29	Synon	ggc	ggA	636C>A	Gly212Gly		fig|562.43589.peg.158	Soluble aldose sugar dehydrogenase, PQQ-dependent (EC 1.1.5.-)	Uncharacterized glutathione S-transferase-like protein	Biofilm regulator BssR	synonymous_variant	LOW
3		PE2		PE4	PE5				3	37.5									0	0									0	0	562.43589.con.0001	313815	ATTTCTC	ATTCTC	1444.19	29.3	0.91	Deletion	gagaaataa	GAGAATaa	565delA	Lys189fs	yes	fig|562.43589.peg.289	Uncharacterized protein YbfC	H repeat-associated protein, YhhI family	Putative uncharacterized protein YbfO	frameshift_variant	HIGH
4	PE1		PE3			PE6		PE8	4	50									0	0									0	0	562.43589.con.0002	101306	T	G	730.443	27.8	1	Nonsyn	ctg	cGg	659T>G	Leu220Arg		fig|562.43589.peg.383	Electron transfer flavoprotein, alpha subunit YgcQ	Electron transfer flavoprotein, beta subunit YgcR	Glycerol uptake operon antiterminator regulatory protein	missense_variant	MODERATE
1							PE7		1	12.5									0	0									0	0	562.43589.con.0002	127950	G	A	21.2185	3	0.5	Nonsyn	gct	Act	277G>A	Ala93Thr		fig|562.43589.peg.413	Murein hydrolase activator NlpD	Protein-L-isoaspartate O-methyltransferase (EC 2.1.1.77)	RNA polymerase sigma factor RpoS	missense_variant	MODERATE
1							PE7		1	12.5									0	0									0	0	562.43589.con.0002	26080	T	A	264.738	9	1									UPF0053 inner membrane protein YgdQ	DNA mismatch repair endonuclease MutH	intergenic_region	MODIFIER
1									0	0									0	0				PE20					1	12.5	562.43589.con.0002	265014	G	A	104.108	7	1									Chaperone protein ClpB (ATP-dependent unfoldase)	SSU rRNA # 16S rRNA, small subunit ribosomal RNA - 3 prime truncation
1									0	0									0	0				PE20					1	12.5	562.43589.con.0002	265033	TCTCAA	CTCCGG	69.8352	5	0.71									Chaperone protein ClpB (ATP-dependent unfoldase)	SSU rRNA # 16S rRNA, small subunit ribosomal RNA - 3 prime truncation
1									0	0									0	0				PE20					1	12.5	562.43589.con.0002	265043	GAAAAGCAAAG	GAAAGCAAAAAT	85.4167	7	0.88	Insertion								Chaperone protein ClpB (ATP-dependent unfoldase)	SSU rRNA # 16S rRNA, small subunit ribosomal RNA - 3 prime truncation
18	PE1		PE3	PE4	PE5		PE7	PE8	6	75	PE9		PE11	PE12	PE13	PE14	PE15	PE16	7	87.5		PE18		PE20	PE21	PE23		PE24	5	62.5	562.43589.con.0002	265258	G	A	497.389	71.1	0.63									Chaperone protein ClpB (ATP-dependent unfoldase)	SSU rRNA # 16S rRNA, small subunit ribosomal RNA - 3 prime truncation
2					PE5				1	12.5									0	0								PE24	1	12.5	562.43589.con.0002	265661	AGCCATGC	AGCCATGCCGCGTGT	53	3.5	0.5	Insertion						fig|562.43589.rna.19	SSU rRNA # 16S rRNA, small subunit ribosomal RNA - 3 prime truncation	Chaperone protein ClpB (ATP-dependent unfoldase)			MODIFIER
4	PE1								1	12.5		PE10							1	12.5	PE17	PE18							2	25	562.43589.con.0002	265663	CCA	CCATGCCGCG	132.5	5.8	0.69	Insertion						fig|562.43589.rna.19	SSU rRNA # 16S rRNA, small subunit ribosomal RNA - 3 prime truncation	Chaperone protein ClpB (ATP-dependent unfoldase)
1									0	0									0	0				PE20					1	12.5	562.43589.con.0003	21088	A	G	13.1143	3	0.5	Nonsyn	tat	tGt	791A>G	Tyr264Cys		fig|562.43589.peg.587	Long-chain-fatty-acid--CoA ligase (EC 6.2.1.3)	Uncharacterized lipoprotein YeaY	Ribonuclease D (EC 3.1.26.3)	missense_variant	MODERATE
1									0	0		PE10							1	12.5									0	0	562.43589.con.0003	225373	GG	GT	1002.47	36	0.92	Nonsyn	ccc	ACc	478C>A	Pro160Thr		fig|562.43589.peg.790	DNA replication terminus site-binding protein	Fumarate hydratase class II (EC 4.2.1.2)	Sensory histidine kinase in two-component regulatory system with RstA	missense_variant	MODERATE
21	PE1	PE2	PE3	PE4	PE5	PE6	PE7	PE8	8	100				PE12	PE13	PE14	PE15	PE16	5	62.5	PE17	PE18	PE19	PE20	PE21	PE22	PE23	PE24	8	100	562.43589.con.0003	225374	G	T	536.574	20.9	0.93	Nonsyn	ccc	Acc	478C>A	Pro160Thr		fig|562.43589.peg.790	DNA replication terminus site-binding protein	Fumarate hydratase class II (EC 4.2.1.2)	Sensory histidine kinase in two-component regulatory system with RstA	missense_variant	MODERATE
1				PE4					1	12.5									0	0									0	0	562.43589.con.0004	104322	A	C	12.8076	3	0.5	Nonsyn	gtc	gGc	680T>G	Val227Gly		fig|562.43589.peg.912	NADH-ubiquinone oxidoreductase chain L (EC 1.6.5.3)	NADH-ubiquinone oxidoreductase chain M (EC 1.6.5.3)	NADH-ubiquinone oxidoreductase chain K (EC 1.6.5.3)	missense_variant	MODERATE
1		PE2							1	12.5									0	0									0	0	562.43589.con.0004	224348	GGAT	GGATACTTCGGC	56.555	3	0.5	Insertion								Na+ dependent nucleoside transporter NupC
1									0	0									0	0				PE20					1	12.5	562.43589.con.0004	31533	C	T	18.6209	2	0.33	Synon	gtc	gtT	1536C>T	Val512Val		fig|562.43589.peg.850	Signal transduction histidine-protein kinase AtoS (EC 2.7.13.3)	Sensor histidine kinase RcsC (EC 2.7.13.3)	Acetoacetate metabolism regulatory protein AtoC	synonymous_variant	LOW
1									0	0						PE14			1	12.5									0	0	562.43589.con.0004	39232	T	A	16.641	3	0.5	Nonsyn	gat	gTt	521A>T	Asp174Val		fig|562.43589.peg.857	Uncharacterized protein YfaQ	Uncharacterized protein YfaP	putative membrane protein	missense_variant	MODERATE
7									0	0									0	0	PE17	PE18	PE19		PE21	PE22	PE23	PE24	7	87.5	562.43589.con.0005	64709	C	A	761.164	31.7	0.97	Synon	cga	Aga	163C>A	Arg55Arg		fig|562.43589.peg.1091	Redox-sensitive transcriptional activator SoxR	DNA-binding transcriptional dual regulator SoxS	hypothetical protein	synonymous_variant	LOW
1									0	0									0	0				PE20					1	12.5	562.43589.con.0006	14388	T	C	11.9934	2	0.33	Nonsyn	att	Gtt	1498A>G	Ile500Val		fig|562.43589.peg.1259	L-aspartate oxidase (EC 1.4.3.16)	tRNA(1)(Val) (adenine(37)-N(6))-methyltransferase (EC 2.1.1.223)	RNA polymerase sigma factor RpoE	missense_variant	MODERATE
1		PE2							1	12.5									0	0									0	0	562.43589.con.0007	125383	CC	CT	951.511	35	0.95	Nonsyn	ggt	AGt	439G>A	Gly147Ser		fig|562.43589.peg.1557	Serine/threonine:Na+ symporter SstT	Inner membrane protein YgjV	Alkaline induced inner membrane protein Alx	missense_variant	MODERATE
6			PE3						1	12.5		PE10			PE13				2	25			PE19			PE22		PE24	3	37.5	562.43589.con.0008	176741	A	G	217.732	32.5	0.66									Uncharacterized transcriptional regulator YieP, GntR family
6			PE3						1	12.5		PE10		PE12	PE13				3	37.5						PE22		PE24	2	25	562.43589.con.0008	176778	A	G	165.846	24.7	0.71									Uncharacterized transcriptional regulator YieP, GntR family
1									0	0	PE9								1	12.5									0	0	562.43589.con.0008	20254	GAAAAAAAAGCG	GAAAAAAAGCG	41.7251	2	0.33	Deletion								Rhodanese-related sulfurtransferase YibN	2,3-bisphosphoglycerate-independent phosphoglycerate mutase (EC 5.4.2.12)	intergenic_region	MODIFIER
2					PE5				1	12.5									0	0					PE21				1	12.5	562.43589.con.0008	2445	TGC	TGA	499.778	26	0.9	Nonsyn	atgcaa	aTGAaa	97C>A	Gln33Lys		fig|562.43589.peg.1604	core protein	Protein YibA	Uncharacterized protein YibG	missense_variant	MODERATE
1									0	0						PE14			1	12.5									0	0	562.43589.con.0008	2446	GC	GA	238.557	16	0.8	Nonsyn	atgcaa	atGAaa	97C>A	Gln33Lys		fig|562.43589.peg.1604	core protein	Protein YibA	Uncharacterized protein YibG	missense_variant	MODERATE
19	PE1	PE2	PE3	PE4		PE6	PE7	PE8	7	87.5		PE10	PE11	PE12	PE13		PE15	PE16	6	75	PE17		PE18	PE19		PE22	PE23	PE24	6	75	562.43589.con.0008	2447	C	A	611.263	27.8	0.85	Nonsyn	caa	Aaa	97C>A	Gln33Lys		fig|562.43589.peg.1604	core protein	Protein YibA	Uncharacterized protein YibG	missense_variant	MODERATE
3		PE2							1	12.5			PE11						1	12.5							PE23		1	12.5	562.43589.con.0008	414	A	G	41.996	8.7	0.54	Synon	aca	acG	414A>G	Thr138Thr		fig|562.43589.peg.1602	Protein RhsA		Protein YibA	synonymous_variant	LOW
13				PE4		PE6	PE7	PE8	4	50		PE10		PE12	PE13		PE15	PE16	5	62.5	PE17	PE18	PE19					PE24	4	50	562.43589.con.0008	480	G	A	173.924	22.8	0.72	Synon	agg	agA	480G>A	Arg160Arg		fig|562.43589.peg.1602	Protein RhsA		Protein YibA	synonymous_variant	LOW
1			PE3						1	12.5									0	0									0	0	562.43589.con.0008	534	TGCG	TACC	30.601	18	0.36	Nonsyn	gatgcg	gaTACC	535GCG>ACC	Ala179Thr		fig|562.43589.peg.1602	Protein RhsA		Protein YibA	missense_variant	MODERATE
3									0	0	PE9								1	12.5				PE20			PE23		2	25	562.43589.con.0008	535	GCG	ACC	49.3189	7.7	0.36	Nonsyn	gcg	ACC	535GCG>ACC	Ala179Thr		fig|562.43589.peg.1602	Protein RhsA		Protein YibA	missense_variant	MODERATE
1									0	0	PE9								1	12.5									0	0	562.43589.con.0008	681	C	G	108.466	8	0.89	Synon	acc	acG	681C>G	Thr227Thr		fig|562.43589.peg.1602	Protein RhsA		Protein YibA	synonymous_variant	LOW
2									0	0	PE9								1	12.5				PE20					1	12.5	562.43589.con.0008	785	A	C	20.6213	6	0.7	Nonsyn	aag	aCg	785A>C	Lys262Thr		fig|562.43589.peg.1602	Protein RhsA		Protein YibA	missense_variant	MODERATE
1									0	0									0	0				PE20					1	12.5	562.43589.con.0008	800	AA	CG	11.4484	5	0.62	Nonsyn	gaa	gCG	800AA>CG	Glu267Ala		fig|562.43589.peg.1602	Protein RhsA		Protein YibA	missense_variant	MODERATE
1									0	0						PE14			1	12.5									0	0	562.43589.con.0009	59260	A	C	18.9561	3	0.5	Nonsyn	tac	Gac	391T>G	Tyr131Asp		fig|562.43589.peg.1830	Chemotaxis protein methyltransferase CheR (EC 2.1.1.80)	Chemotaxis response regulator protein-glutamate methylesterase CheB (EC 3.1.1.61)	Methyl-accepting chemotaxis protein IV (dipeptide chemoreceptor protein)	missense_variant	MODERATE
1									0	0					PE13				1	12.5									0	0	562.43589.con.0010	148478	CTGAG	TGTAC	96.3357	4	0.67	Nonsyn	cctgag	cTGTAC	1304CTGAG>TGTAC	ProGlu435LeuTyr		fig|562.43589.peg.2066	Ferric hydroxamate outer membrane receptor FhuA	hypothetical protein		missense_variant	MODERATE
1									0	0	PE9								1	12.5									0	0	562.43589.con.0010	73619	G	A	17.6006	2	0.33	Nonsyn	gac	Aac	763G>A	Asp255Asn		fig|562.43589.peg.2000	UDP-N-acetylmuramoyl-dipeptide--2,6-diaminopimelate ligase (EC 6.3.2.13)	Cell division protein FtsI [Peptidoglycan synthetase] (EC 2.4.1.129)	UDP-N-acetylmuramoyl-tripeptide--D-alanyl-D-alanine ligase (EC 6.3.2.10)	missense_variant	MODERATE
1									0	0			PE11						1	12.5									0	0	562.43589.con.0011	126276	T	C	13.1873	2	0.33	Synon	cat	caC	744T>C	His248His		fig|562.43589.peg.2202	Transcriptional repressor protein TyrR	Membrane protein YcjF	Thiol peroxidase, Tpx-type (EC 1.11.1.15)	synonymous_variant	LOW
1								PE8	1	12.5									0	0									0	0	562.43589.con.0011	48381	TTTTACAAGTTTGTTGAATCC	ATATACTGGTGACGATCA	198.905	3	0.21	Deletion	ggattcaacaaacttgtaaaa	TGATCGTCACCAGTATAT	682_702delGGATTCAACAAACTTGTAAAAinsTGATCGTCACCAGTATAT	Gly228_Lys234delinsTerSerSerProValTyr		fig|562.43589.peg.2124	Putative potassium channel protein	Mobile element protein	YciL protein
1									0	0						PE14			1	12.5									0	0	562.43589.con.0011	60622	CGGGGGTGC	CGGGGGGTGC	24.5	2	0.33	Insertion	tgcacccccggc	tGCACCCCCCGgc	1132_1133insC	Thr378_Pro379fs	yes	fig|562.43589.peg.2138	Anthranilate synthase, aminase component (EC 4.1.3.27)	Anthranilate synthase, amidotransferase component (EC 4.1.3.27) / Anthranilate phosphoribosyltransferase (EC 2.4.2.18)	FIG00031715: Predicted metal-dependent phosphoesterases (PHP family)	frameshift_variant	HIGH
10		PE2		PE3		PE5		PE8	4	50		PE10		PE12	PE13			PE16	4	50			PE19					PE24	2	25	562.43589.con.0012	1	TTCGAT	CTGCCTGTATGTGCCCGTTTCGAT	139.693	5.5	0.35	Insertion									Transposase InsD for insertion element IS2	intergenic_region	MODIFIER
1				PE4					1	12.5									0	0									0	0	562.43589.con.0012	62412	T	C	10.6239	3	0.5									Ribose-5-phosphate isomerase A (EC 5.3.1.6)	Putative uncharacterized protein YqfE	intergenic_region	MODIFIER
1									0	0									0	0				PE20					1	12.5	562.43589.con.0012	63071	CGGTT	CGGCT	18.921	2	0.33	Synon	accggttcg	acCGGCTcg	261T>C	Gly87Gly		fig|562.43589.peg.2267	Transcriptional regulator ArgP, LysR family	Putative uncharacterized protein YqfE	Methylmalonyl-CoA mutase (EC 5.4.99.2)	synonymous_variant	LOW
10		PE2		PE4	PE5	PE6	PE7		5	62.5								PE16	1	12.5			PE19		PE21		PE23	PE24	4	50	562.43589.con.0014	125803	C	T	18.8792	25.5	0.62							fig|562.43589.rna.43	5S rRNA ## 5S ribosomal RNA	Molybdopterin-guanine dinucleotide biosynthesis protein MobB
3			PE13						1	12.5								PE16	1	12.5			PE19						1	12.5	562.43589.con.0014	125975	CAT	CAAT	18.3573	5.3	0.53	Insertion								5S rRNA ## 5S ribosomal RNA
6		PE2				PE6			2	25		PE10					PE15		2	25	PE17	PE18							2	25	562.43589.con.0014	125989	C	G	52.7739	5.8	0.63									5S rRNA ## 5S ribosomal RNA
9									0	0						PE14	PE15		2	25	PE17	PE18	PE19		PE21	PE22	PE23	PE24	7	87.5	562.43589.con.0014	61021	G	C	521.363	38.1	0.98	Nonsyn	ggc	gCc	266G>C	Gly89Ala		fig|562.43589.peg.2517	Copper-sensing two-component system response regulator CpxR	Periplasmic protein CpxP	Copper sensory histidine kinase CpxA	missense_variant	MODERATE
4									0	0		PE10	PE12	PE13				PE16	4	50									0	0	562.43589.con.0014	61971	T	C	1664.82	48.8	0.99	Nonsyn	gtc	gCc	521T>C	Val174Ala		fig|562.43589.peg.2518	Copper sensory histidine kinase CpxA	Copper-sensing two-component system response regulator CpxR	Protein YiiM	missense_variant	MODERATE
1									0	0							PE15		1	12.5									0	0	562.43589.con.0014	62018	GCGCG	GCGCA	460.75	17	0.77	Nonsyn	gcgcgt	GCGCAt	572G>A	Arg191His		fig|562.43589.peg.2518	Copper sensory histidine kinase CpxA	Copper-sensing two-component system response regulator CpxR	Protein YiiM	missense_variant	MODERATE
1									0	0									0	0							PE23		1	12.5	562.43589.con.0014	62019	CGCG	CGCA	955.764	35	0.92	Nonsyn	gcgcgt	gCGCAt	572G>A	Arg191His		fig|562.43589.peg.2518	Copper sensory histidine kinase CpxA	Copper-sensing two-component system response regulator CpxR	Protein YiiM	missense_variant	MODERATE
13									0	0	PE9	PE10		PE12	PE13	PE14		PE16	6	75	PE17	PE18	PE19	PE20	PE21	PE22		PE24	7	87.5	562.43589.con.0014	62022	G	A	78.3925	33.2	0.96	Nonsyn	cgt	cAt	572G>A	Arg191His		fig|562.43589.peg.2518	Copper sensory histidine kinase CpxA	Copper-sensing two-component system response regulator CpxR	Protein YiiM	missense_variant	MODERATE
3		PE2		PE4	PE5				3	37.5									0	0									0	0	562.43589.con.0014	79793	C	A	680.299	19.7	0.93	Synon	ggg	ggT	585G>T	Gly195Gly		fig|562.43589.peg.2536	Sulfur carrier protein FdhD	Uncharacterized protein YiiG	bogus protein	synonymous_variant	LOW
1									0	0								PE16	1	12.5									0	0	562.43589.con.0015	114180	TTTTGACTC	AACTGTCC	93.454	2	0.2	Deletion								Type-1 fimbrial protein, A chain	Type 1 fimbriae regulatory protein FimE	intergenic_region	MODIFIER
1									0	0									0	0		PE18							1	12.5	562.43589.con.0015	2	GTATCCAG	TTACGTGCCGAAGTATCCAG	37.3175	3	0.38	Insertion									Chaperone protein DnaJ	intergenic_region	MODIFIER
1									0	0	PE9								1	12.5									0	0	562.43589.con.0015	55134	C	G	16.0981	3	0.5	Synon	gtc	gtG	66C>G	Val22Val		fig|562.43589.peg.2638	FIG001826: putative inner membrane protein	FIG023911: putative membrane protein	Primosomal protein I	synonymous_variant	LOW
1									0	0									0	0				PE20					1	12.5	562.43589.con.0015	90179	A	T	24.1659	3	0.43	Nonsyn	aat	aTt	260A>T	Asn87Ile		fig|562.43589.peg.2667	Uncharacterized inner membrane protein YjiN	Multidrug efflux pump MdtM (of MFS type)	Uncharacterized protein YjiM	missense_variant	MODERATE
1					PE5				1	12.5									0	0									0	0	562.43589.con.0016	15673	GATAC	GATAA	474.116	19	0.73	Synon	gggtatcag	ggTTATCag	1086G>T	Gly362Gly		fig|562.43589.peg.2712	Outer membrane usher protein YehB	Uncharacterized fimbrial-like protein YehA	Probable fimbrial chaperone YehC	synonymous_variant	LOW
1									0	0									0	0	PE17								1	12.5	562.43589.con.0016	15675	TAC	TAA	761.799	27	0.87	Synon	gggtat	ggTTAt	1086G>T	Gly362Gly		fig|562.43589.peg.2712	Outer membrane usher protein YehB	Uncharacterized fimbrial-like protein YehA	Probable fimbrial chaperone YehC	synonymous_variant	LOW
19	PE1	PE2	PE3	PE4		PE6	PE7	PE8	7	87.5		PE10		PE12	PE13	PE14	PE15	PE16	6	75		PE18	PE19		PE21	PE22	PE23	PE24	6	75	562.43589.con.0016	15677	C	A	1352.51	26.6	0.95	Synon	ggg	ggT	1086G>T	Gly362Gly		fig|562.43589.peg.2712	Outer membrane usher protein YehB	Uncharacterized fimbrial-like protein YehA	Probable fimbrial chaperone YehC	synonymous_variant	LOW
1			PE3						1	12.5									0	0									0	0	562.43589.con.0017	112483	AGC	AGCACCGCCGG	100.579	4	0.67	Insertion								Putative uncharacterized protein YrhA
1									0	0	PE9								1	12.5									0	0	562.43589.con.0017	91461	C	T	13.3573	2	0.33	Nonsyn	gcc	gTc	515C>T	Ala172Val		fig|562.43589.peg.2895	Aerobic glycerol-3-phosphate dehydrogenase (EC 1.1.5.3)	Thiosulfate sulfurtransferase GlpE (EC 2.8.1.1)	Putative uncharacterized protein YzgL	missense_variant	MODERATE
1									0	0				PE12					1	12.5									0	0	562.43589.con.0018	102467	CTTTTTTTTCGTG	CTTTTTTTTCGTA	306.461	20	0.56									tRNA-Ser-GGA	Uncharacterized protein YcdU	intergenic_region	MODIFIER
21	PE1	PE2	PE3	PE4	PE5	PE6	PE7	PE8	8	100		PE10			PE13	PE14	PE15	PE16	5	62.5	PE17	PE18	PE19	PE20	PE21	PE22	PE23	PE24	8	100	562.43589.con.0018	102479	G	A	1374.05	27.4	0.79									tRNA-Ser-GGA	Uncharacterized protein YcdU	intergenic_region	MODIFIER
22	PE1	PE2	PE3	PE4	PE5	PE6		PE8	7	87.5	PE9	PE10		PE12	PE13	PE14	PE15	PE16	7	87.5	PE17	PE18	PE19	PE20	PE21	PE22	PE23	PE24	8	100	562.43589.con.0018	102519	G	T	1378.42	28.6	0.7									tRNA-Ser-GGA	Uncharacterized protein YcdU	intergenic_region	MODIFIER
1									0	0									0	0		PE18							1	12.5	562.43589.con.0018	104256	TCGC	TCGCAGTGTAGCCCTGA	27.7342	2	0.33	Insertion	tttcgc	ttTCGCAGTGTAGCCCTGA			yes	fig|562.43589.peg.3028	Transposase InsE for insertion sequence IS3E	Malonyl CoA-acyl carrier protein transacylase (EC 2.3.1.39)
1						PE6			1	12.5									0	0									0	0	562.43589.con.0018	1486	ACACTCTGTCATCATTTCATCATTTCATCATTTCATCATTTCATCATTTCATCATTT	ACACTCTGTCATCATTTCATCATTTCATCATTTCATCATTTCATCATTTCATCATTTCATCATTT	178.919	16	0.62	Insertion								Bacteriophage T4 late gene expression blocking protein	Uncharacterized protein YmfE	intergenic_region	MODIFIER
1									0	0			PE11						1	12.5									0	0	562.43589.con.0018	46927	C	T	16.6248	2	0.33	Synon	ctg	ctA	1134G>A	Leu378Leu		fig|562.43589.peg.2959	3-oxoacyl-[acyl-carrier-protein] synthase, KASII (EC 2.3.1.179)	Aminodeoxychorismate lyase (EC 4.1.3.38)	Acyl carrier protein	synonymous_variant	LOW
1									0	0						PE14			1	12.5									0	0	562.43589.con.0018	52741	AGGCT	AGGCA	183.288	8	0.62	Nonsyn	cagcct	cTGCCT	461A>T	Gln154Leu		fig|562.43589.peg.2966	FIG01269488: protein, clustered with ribosomal protein L32p	LSU ribosomal protein L32p @ LSU ribosomal protein L32p, zinc-independent	Maf-like protein YceF	missense_variant	MODERATE
1									0	0									0	0		PE18							1	12.5	562.43589.con.0018	52743	GCT	GCA	996.096	33	0.89	Nonsyn	cagcct	cTGCct	461A>T	Gln154Leu		fig|562.43589.peg.2966	FIG01269488: protein, clustered with ribosomal protein L32p	LSU ribosomal protein L32p @ LSU ribosomal protein L32p, zinc-independent	Maf-like protein YceF	missense_variant	MODERATE
22	PE1	PE2	PE3	PE4	PE5	PE6	PE7	PE8	8	100	PE9	PE10	PE11	PE12	PE13		PE15	PE16	7	87.5	PE17		PE19	PE20	PE21	PE22	PE23	PE24	7	87.5	562.43589.con.0018	52745	T	A	1107.04	30.6	0.98	Nonsyn	cag	cTg	461A>T	Gln154Leu		fig|562.43589.peg.2966	FIG01269488: protein, clustered with ribosomal protein L32p	LSU ribosomal protein L32p @ LSU ribosomal protein L32p, zinc-independent	Maf-like protein YceF	missense_variant	MODERATE
22	PE1	PE2	PE3	PE4	PE5	PE6	PE7	PE8	8	100		PE10	PE11	PE12	PE13	PE14	PE15	PE16	7	87.5	PE17	PE18	PE19		PE21	PE22	PE23	PE24	7	87.5	562.43589.con.0018	95201	C	A	1061.23	30.5	0.99	Nonsyn	gtc	Ttc	352G>T	Val118Phe		fig|562.43589.peg.3014	Major curlin subunit precursor CsgA	Putative curli production protein CsgC	Minor curlin subunit CsgB, nucleation component of curlin monomers	missense_variant	MODERATE
2				PE4	PE5				2	25									0	0									0	0	562.43589.con.0019	35429	G	A	433.27	15.5	0.97	Nonsyn	gca	Aca	262G>A	Ala88Thr		fig|562.43589.peg.3062	Inner membrane protein YiaA	Inner membrane protein YiaB	Inner membrane protein YiaH	missense_variant	MODERATE
1									0	0				PE12					1	12.5									0	0	562.43589.con.0022	70645	TAAAC	TAAACACCG	98.5611	4	0.67	Insertion								Phage integrase			MODIFIER
1									0	0									0	0				PE20					1	12.5	562.43589.con.0023	20650	T	G	20.3289	3	0.5	Synon	cgt	cgG	1338T>G	Arg446Arg		fig|562.43589.peg.3378	Uncharacterized protein YegI	Uncharacterized protein YegJ	Uncharacterized chaperone protein YegD	synonymous_variant	LOW
1									0	0	PE9								1	12.5									0	0	562.43589.con.0024	36753	A	C	25.6581	2	0.33	Nonsyn	gat	gCt	1106A>C	Asp369Ala		fig|562.43589.peg.3450	Ribonucleotide reductase of class III (anaerobic), large subunit (EC 1.17.4.2)	hypothetical protein	Ribonucleotide reductase of class III (anaerobic), activating protein (EC 1.97.1.4)	missense_variant	MODERATE
1									0	0	PE9								1	12.5									0	0	562.43589.con.0024	4904	C	T	10.1469	2	0.33	Nonsyn	cag	Tag	1003C>T	Gln335*		fig|562.43589.peg.3423	L-idonate 5-dehydrogenase (EC 1.1.1.264)	Gluconokinase (EC 2.7.1.12)	5-keto-D-gluconate 5-reductase (EC 1.1.1.69)	stop_gained	HIGH
1									0	0									0	0					PE21				1	12.5	562.43589.con.0025	16817	A	C	81.296	21	0.55	Synon	ggt	ggG	498T>G	Gly166Gly		fig|562.43589.peg.3493	Uncharacterized protein YneK	Probable sugar efflux transporter	LysR family transcriptional regulator YneJ	synonymous_variant	LOW
4	PE1		PE3			PE6		PE8	4	50									0	0									0	0	562.43589.con.0027	191	C	T	849.057	25.2	0.98	Nonsyn	tcc	tTc	77C>T	Ser26Phe		fig|562.43589.peg.3586	PTS system, mannitol-specific IIABC component (EIIABC-Mtl) (Mannitol- permease IIABC component) (Phosphotransferase enzyme II, ABC component) (EC 2.7.1.69)	Transposase InsH for insertion sequence element IS5	Uncharacterized protein YhcF	missense_variant	MODERATE
6	PE1		PE3			PE6			3	37.5		PE10			PE13				2	25		PE18							1	12.5	562.43589.con.0027	57160	C	T	152.446	8.5	1							fig|562.43589.rna.60	5S rRNA ## 5S ribosomal RNA	tRNA-Thr-GGT
1									0	0					PE13				1	12.5									0	0	562.43589.con.0028	54883	TGAGCAC	TGAGCAGTGGCAC	80.5844	4	0.5	Insertion	gtgctcaatctgtac	GTGCCACTGCTCAatctgtac	1_2insTGCCAC	Val1_Leu2insValProLeu		fig|562.43589.peg.3693	Ferric hydroxamate outer membrane receptor FhuA	Ferric hydroxamate ABC transporter (TC 3.A.1.14.3), ATP-binding protein FhuC	Mobile element protein	inframe_insertion	MODERATE
4	PE1					PE6			2	25		PE10							1	12.5			PE19						1	12.5	562.43589.con.0028	54885	AGC	AGCAGTGGC	59.0773	4.8	0.66	Insertion	gtgctcaatctg	gtGCCACTGCTcaatctg	2_3insGCCACT	Val1_Leu2insValProLeu		fig|562.43589.peg.3693	Ferric hydroxamate outer membrane receptor FhuA	Ferric hydroxamate ABC transporter (TC 3.A.1.14.3), ATP-binding protein FhuC	Mobile element protein	inframe_insertion	MODERATE
1									0	0		PE10							1	12.5									0	0	562.43589.con.0030	1	AGTGC	CGAGTGC	85.8711	5	0.83	Insertion									hypothetical protein	intergenic_region	MODIFIER
1									0	0								PE16	1	12.5									0	0	562.43589.con.0030	41419	TACGC	TACGCCTTCCGGCAG	28.3762	2	0.25	Insertion	taa	tCTGCCGGAAGGCGTA			yes	fig|562.43589.peg.3817	Translation elongation factor Tu	Chitinase (EC 3.2.1.14)			MODIFIER
1									0	0		PE10							1	12.5									0	0	562.43589.con.0032	10600	GT	GA	1540.86	53	0.95	Synon	gcaccg	gcTCcg	1482A>T	Ala494Ala		fig|562.43589.peg.3867	Proline/sodium symporter PutP (TC 2.A.21.2.1) @ Propionate/sodium symporter	Ferrous iron transport permease EfeU	FIG00638688: hypothetical protein	synonymous_variant	LOW
22	PE1	PE2	PE3	PE4	PE5	PE6	PE7	PE8	8	100	PE9			PE12	PE13	PE14	PE15	PE16	6	75	PE17	PE18	PE19	PE20	PE21	PE22	PE23	PE24	8	100	562.43589.con.0032	10601	T	A	1178.71	23	0.93	Synon	gca	gcT	1482A>T	Ala494Ala		fig|562.43589.peg.3867	Proline/sodium symporter PutP (TC 2.A.21.2.1) @ Propionate/sodium symporter	Ferrous iron transport permease EfeU	FIG00638688: hypothetical protein	synonymous_variant	LOW
1									0	0	PE9								1	12.5									0	0	562.43589.con.0047	3221	A	T	12.2563	2	0.29									Gamma-glutamyl phosphate reductase (EC 1.2.1.41)	tRNA-Thr-CGT	intergenic_region	MODIFIER
1									0	0									0	0								PE24	1	12.5	562.43589.con.0049	4	TCT	CCGTCT	25.712	2	0.33	Insertion									Glucose-1-phosphate thymidylyltransferase (EC 2.7.7.24)	intergenic_region	MODIFIER
1									0	0				PE12					1	12.5									0	0	562.43589.con.0050	8766	AACAG	AACAGGGACAATATCGCCAT	10.9941	4	0.4	Insertion	tag	tATGGCGATATTGTCCCTGTT				fig|562.43589.peg.4389	Putative potassium channel protein	Cardiolipin synthase, bacterial type ClsA			MODIFIER
1									0	0		PE10							1	12.5									0	0	562.43589.con.0055	1	AGAACAG	CTAAGAACAG	71.1941	6	1	Insertion									hypothetical protein	intergenic_region	MODIFIER
3									0	0							PE15		1	12.5						PE22	PE23		2	25	562.43589.con.0060	1	GAAACAT	GAAGTGAAACAT	64.395	2.7	0.26	Insertion									LSU rRNA ## 23S rRNA, large subunit ribosomal RNA	intergenic_region	MODIFIER
1									0	0									0	0					PE21				1	12.5	562.43589.con.0060	2	AAACAT	TAAGAAACAT	38.9346	2	0.22	Insertion									LSU rRNA ## 23S rRNA, large subunit ribosomal RNA	intergenic_region	MODIFIER
22	PE1	PE2	PE3	PE4	PE5	PE6	PE7	PE8	8	100	PE9	PE10	PE11	PE12	PE13	PE14	PE15	PE16	7	87.5	PE17		PE19		PE21	PE22	PE23	PE24	6	75	562.43589.con.0060	2937	G	C	726.3	52.1	0.55									LSU rRNA ## 23S rRNA, large subunit ribosomal RNA		intergenic_region	MODIFIER
4									0	0									0	0		PE18	PE19	PE20			PE23		4	50	562.43589.con.0060	2949	ATGA	ATTGA	22.859	37.5	0.53	Insertion								LSU rRNA ## 23S rRNA, large subunit ribosomal RNA		intergenic_region	MODIFIER
6	PE1				PE5				2	25					PE13			PE16	2	25					PE21		PE23		2	25	562.43589.con.0060	3021	TGGCGGC	TGGCGGCCGTAGCGCG	196.845	2.2	0.26	Insertion								LSU rRNA ## 23S rRNA, large subunit ribosomal RNA			MODIFIER
2									0	0						PE14			1	12.5		PE18							1	12.5	562.43589.con.0060	3022	GGC	GGCGGCCGTAGCGC	25.6416	2	0.26	Insertion								LSU rRNA ## 23S rRNA, large subunit ribosomal RNA		intergenic_region	MODIFIER
1									0	0				PE12					1	12.5									0	0	562.43589.con.0060	3026	GC	GT	69.0355	5	0.71									LSU rRNA ## 23S rRNA, large subunit ribosomal RNA		intergenic_region	MODIFIER
14	PE1		PE3			PE6			3	37.5		PE10		PE12	PE13	PE14		PE16	5	62.5		PE18	PE19		PE21	PE22	PE23	PE24	6	75	562.43589.con.0062	61	A	C	224.078	8.8	0.95										Retron-type RNA-directed DNA polymerase (EC 2.7.7.49)	intergenic_region	MODIFIER
13			PE3	PE4	PE5		PE7	PE8	5	62.5		PE10	PE11		PE13			PE16	3	37.5			PE19		PE21	PE22	PE23		4	50	562.43589.con.0064	1119	A	T	315.556	32.5	0.57	Synon	cca	ccT	447A>T	Pro149Pro		fig|562.43589.peg.4452	Serine recombinase, PinQ/PinR-type	Uncharacterized protein, YnaE family	Phage tail fiber, tail fiber assembly protein Tfa	synonymous_variant	LOW
1									0	0							PE15		1	12.5									0	0	562.43589.con.0064	1146	GGC	GGT	13.8046	26	0.51	Nonsyn	caggcg	caGGTg	476C>T	Ala159Val		fig|562.43589.peg.4452	Serine recombinase, PinQ/PinR-type	Uncharacterized protein, YnaE family	Phage tail fiber, tail fiber assembly protein Tfa	missense_variant	MODERATE
11			PE3	PE4			PE7	PE8	4	50		PE10	PE11		PE13			PE16	4	50	PE17		PE19		PE21				3	37.5	562.43589.con.0064	1148	C	T	34.2304	34.7	0.6	Nonsyn	gcg	gTg	476C>T	Ala159Val		fig|562.43589.peg.4452	Serine recombinase, PinQ/PinR-type	Uncharacterized protein, YnaE family	Phage tail fiber, tail fiber assembly protein Tfa	missense_variant	MODERATE
6		PE2		PE4				PE8	3	37.5				PE12					1	12.5							PE23	PE24	2	25	562.43589.con.0064	1690	C	T	178.649	34.8	0.57	Nonsyn	gac	Aac	247G>A	Asp83Asn		fig|562.43589.peg.4453	Phage tail fiber, tail fiber assembly protein Tfa	Serine recombinase, PinQ/PinR-type	Phage tail fiber, side tail fiber protein Stf	missense_variant	MODERATE
1									0	0									0	0		PE18							1	12.5	562.43589.con.0064	2068	AGTA	AGTATGCGCG	57.4997	3	0.5	Insertion	catactgtcggt	caCGCGCATACTgtcggt	2_3insCGCGCA	His1_Thr2insHisAlaHis		fig|562.43589.peg.4454	Phage tail fiber, side tail fiber protein Stf	Phage tail fiber, tail fiber assembly protein Tfa		disruptive_inframe_insertion	MODERATE
13		PE2	PE3	PE4			PE7	PE8	5	62.5				PE12	PE13	PE14	PE15		4	50	PE17				PE21		PE23	PE24	4	50	562.43589.con.0064	274	C	A	342.806	31.9	0.6	Nonsyn	aca	aAa	152C>A	Thr51Lys		fig|562.43589.peg.4451	Uncharacterized protein, YnaE family		Serine recombinase, PinQ/PinR-type	missense_variant	MODERATE
9		PE2		PE4			PE7	PE8	4	50				PE12	PE13	PE14			3	37.5		PE18	PE19						2	25	562.43589.con.0064	680	G	A	700.666	32.7	0.56	Nonsyn	cga	cAa	8G>A	Arg3Gln		fig|562.43589.peg.4452	Serine recombinase, PinQ/PinR-type	Uncharacterized protein, YnaE family	Phage tail fiber, tail fiber assembly protein Tfa	missense_variant	MODERATE
10		PE2	PE3		PE5			PE8	4	50	PE9				PE13				2	25	PE17			PE20	PE21		PE23		4	50	562.43589.con.0064	975	G	T	680.558	31	0.62	Synon	ggg	ggT	303G>T	Gly101Gly		fig|562.43589.peg.4452	Serine recombinase, PinQ/PinR-type	Uncharacterized protein, YnaE family	Phage tail fiber, tail fiber assembly protein Tfa	synonymous_variant	LOW
4									0	0			PE11		PE13		PE15		3	37.5								PE24	1	12.5	562.43589.con.0066	1581	T	G	14.695	18.2	0.68	Synon	cca	ccC	111A>C	Pro37Pro		fig|562.43589.peg.4458	core protein			synonymous_variant	LOW
2							PE7		1	12.5						PE14			1	12.5									0	0	562.43589.con.0066	636	G	A	49.3373	11	0.7	Synon	cgc	cgT	1056C>T	Arg352Arg		fig|562.43589.peg.4458	core protein			synonymous_variant	LOW
2							PE7		1	12.5						PE14			1	12.5									0	0	562.43589.con.0066	642	T	C	34.0384	11	0.68	Synon	cta	ctG	1050A>G	Leu350Leu		fig|562.43589.peg.4458	core protein			synonymous_variant	LOW
1									0	0						PE14			1	12.5									0	0	562.43589.con.0068	229	G	C	18.3126	2	0.33	Nonsyn	ctg	Gtg	271C>G	Leu91Val		fig|562.43589.peg.4460	hypothetical protein		Protein RhsC	missense_variant	MODERATE
1									0	0									0	0		PE18							1	12.5	562.43589.con.0070	1342	G	C	14.5093	3	0.5									Mobile element protein
1									0	0									0	0		PE18							1	12.5	562.43589.con.0070	1343	G	C	58.4845	4	0.67									Mobile element protein
1									0	0									0	0		PE18							1	12.5	562.43589.con.0070	1344	G	C	33.965	3	0.5									Mobile element protein
5	PE1			PE4		PE6			3	37.5									0	0		PE18	PE19						2	25	562.43589.con.0071	1	AGGCGA	CACCTAGGCGA	18.9044	3	0.32	Insertion						fig|562.43589.rna.85	SSU rRNA # 16S rRNA, small subunit ribosomal RNA - 5 prime truncation			intergenic_region	MODIFIER
2									0	0							PE15		1	12.5			PE19						1	12.5	562.43589.con.0071	1276	AGAAGCGT	AGAAGCGTACTTTGCAG	36.0249	3	0.3	Insertion								SSU rRNA # 16S rRNA, small subunit ribosomal RNA - 5 prime truncation			MODIFIER
3	PE1	PE2							2	25				PE12					1	12.5									0	0	562.43589.con.0071	1278	AAGCGT	AAGCGTTCTTTGCAG	73.7004	2	0.21	Insertion								SSU rRNA # 16S rRNA, small subunit ribosomal RNA - 5 prime truncation			MODIFIER
5						PE6		PE8	2	25					PE13			PE16	2	25							PE23		1	12.5	562.43589.con.0071	1279	AGCGT	AGCGTACTTTGCAGTGCTCACAC	23.978	2.8	0.23	Insertion								SSU rRNA # 16S rRNA, small subunit ribosomal RNA - 5 prime truncation			MODIFIER
2									0	0		PE10		PE12					2	25									0	0	562.43589.con.0071	2	GGCGA	CTAGGCGA	90.5387	6	0.46	Insertion						fig|562.43589.rna.85	SSU rRNA # 16S rRNA, small subunit ribosomal RNA - 5 prime truncation			intergenic_region	MODIFIER
3			PE3			PE6		PE8	3	37.5									0	0									0	0	562.43589.con.0072	1	TGATCT	CGTTCAGAAAGCTGATCT	37.4193	4.7	0.49	Insertion									Transposase InsE for insertion sequence IS3E	intergenic_region	MODIFIER
1						PE6			1	12.5									0	0									0	0	562.43589.con.0072	1251	TAGGATCA	TAGGATCAGGATCAGAC	122.989	4	0.36	Insertion								Transposase InsF for insertion sequence IS3 @ Mobile element protein			MODIFIER
3	PE1							PE8	2	25									0	0			PE19						1	12.5	562.43589.con.0072	1253	GGATCA	GGATCAGGATCAGAC	62.8506	2.7	0.39	Insertion								Transposase InsF for insertion sequence IS3 @ Mobile element protein			MODIFIER
3		PE2	PE3						2	25								PE16	1	12.5									0	0	562.43589.con.0072	1254	GATCA	GATCAAAATGCCGCTTTAT	29.0574	2.3	0.3	Insertion								Transposase InsF for insertion sequence IS3 @ Mobile element protein			MODIFIER
1									0	0		PE10							1	12.5									0	0	562.43589.con.0072	1256	T	C	26.4952	4	0.67									Transposase InsF for insertion sequence IS3 @ Mobile element protein
1									0	0								PE16	1	12.5									0	0	562.43589.con.0072	1258	A	C	52.1937	3	0.43									Transposase InsF for insertion sequence IS3 @ Mobile element protein
1									0	0		PE10							1	12.5									0	0	562.43589.con.0072	3	ATCTTAC	TACAGGTTGTAATCTGATCTTAC	12.5519	2	0.25	Insertion									Transposase InsE for insertion sequence IS3E	intergenic_region	MODIFIER
1									0	0					PE13				1	12.5									0	0	562.43589.con.0072	7	TAC	GATCTTAC	219.394	10	0.77	Insertion									Transposase InsE for insertion sequence IS3E	intergenic_region	MODIFIER
1									0	0									0	0		PE18							1	12.5	562.43589.con.0073	1216	TCTAC	TCTACAG	60.796	3	0.33	Insertion								Transposase InsI for insertion sequence element IS30
3							PE7		1	12.5									0	0				PE20				PE24	2	25	562.43589.con.0073	176	G	A	26.4766	24.3	0.55	Synon	aac	aaT	984C>T	Asn328Asn		fig|562.43589.peg.4468	Transposase InsI for insertion sequence element IS30			synonymous_variant	LOW
1									0	0									0	0							PE23		1	12.5	562.43589.con.0073	4	AGAT	GTAGAT	54.6855	3	0.43	Insertion									Transposase InsI for insertion sequence element IS30	intergenic_region	MODIFIER
2									0	0	PE9		PE11						2	25									0	0	562.43589.con.0073	467	T	C	30.8062	4	0.45	Synon	cta	ctG	693A>G	Leu231Leu		fig|562.43589.peg.4468	Transposase InsI for insertion sequence element IS30			synonymous_variant	LOW
3						PE6			1	12.5									0	0			PE19			PE22			2	25	562.43589.con.0074	1	AAAAACT	GATTTATCCATTAACAAAAACT	23.7565	2	0.29	Insertion	aaaaactggatcgacaaagaagaa	GATTTATCCATTAACAAAAACTggatcgacaaagaagaa	1_2insGATTTATCCATTAAC	Lys1_Asn2insAspLeuSerIleAsnLys		fig|562.43589.peg.4469	Glutamate decarboxylase (EC 4.1.1.15)			inframe_insertion	MODERATE
1						PE6			1	12.5									0	0									0	0	562.43589.con.0074	1128	TGCCC	TGCCCAACAGAACAGCTT	29.0303	2	0.33	Insertion	attgcc	atTGCCCAACAGAACAGCTT			yes	fig|562.43589.peg.4469	Glutamate decarboxylase (EC 4.1.1.15)
3				PE4					1	12.5							PE15		1	12.5					PE21				1	12.5	562.43589.con.0074	398	CT	CC	187.443	30	0.6	Synon	act	aCC	399T>C	Thr133Thr		fig|562.43589.peg.4469	Glutamate decarboxylase (EC 4.1.1.15)			synonymous_variant	LOW
12	PE1	PE2	PE3			PE6		PE8	5	62.5				PE12	PE13				2	25		PE18		PE20		PE22	PE23	PE24	5	62.5	562.43589.con.0074	399	T	C	638.584	33.8	0.63	Synon	act	acC	399T>C	Thr133Thr		fig|562.43589.peg.4469	Glutamate decarboxylase (EC 4.1.1.15)			synonymous_variant	LOW
16	PE1	PE2	PE3	PE4		PE6	PE7		6	75	PE9			PE12	PE13		PE15		4	50		PE18		PE20	PE21	PE22	PE23	PE24	6	75	562.43589.con.0074	456	T	C	499.774	27.5	0.6	Synon	gat	gaC	456T>C	Asp152Asp		fig|562.43589.peg.4469	Glutamate decarboxylase (EC 4.1.1.15)			synonymous_variant	LOW
5	PE1	PE2						PE8	3	37.5		PE10							1	12.5				PE20					1	12.5	562.43589.con.0074	936	C	T	142.115	25.2	0.54	Synon	tac	taT	936C>T	Tyr312Tyr		fig|562.43589.peg.4469	Glutamate decarboxylase (EC 4.1.1.15)			synonymous_variant	LOW
3	PE1								1	12.5					PE13				1	12.5	PE17								1	12.5	562.43589.con.0076	1	GAACAG	CATCTGGAGCCATAGAACAG	203.236	2	0.15	Insertion									Transposase InsH for insertion sequence element IS5	intergenic_region	MODIFIER
1									0	0									0	0		PE18							1	12.5	562.43589.con.0076	1051	GGCATTTA	GGCATTTAC	127.087	7	0.64	Insertion								Transposase InsH for insertion sequence element IS5			MODIFIER
1									0	0									0	0						PE22			1	12.5	562.43589.con.0076	1053	CATTTA	CATTTATGGG	30.7137	2	0.15	Insertion								Transposase InsH for insertion sequence element IS5			MODIFIER
13		PE2		PE4	PE5	PE6		PE8	5	62.5		PE10		PE12	PE13		PE15	PE16	5	62.5	PE17						PE23	PE24	3	37.5	562.43589.con.0076	1054	ATTTA	ATTTAC	136.414	7.3	0.61	Insertion								Transposase InsH for insertion sequence element IS5			MODIFIER
1									0	0									0	0		PE18							1	12.5	562.43589.con.0076	2	AACAGGGTTC	ATCTGGAGCCATAGAACAGGGTTC	16.0328	2	0.18	Insertion									Transposase InsH for insertion sequence element IS5	intergenic_region	MODIFIER
2					PE5				1	12.5									0	0						PE22			1	12.5	562.43589.con.0076	3	ACAGGGTTC	TGTTTGTCATCTGGAGCCATAGAACAGGGTTC	18.7023	2	0.2	Insertion									Transposase InsH for insertion sequence element IS5	intergenic_region	MODIFIER
1								PE8	1	12.5									0	0									0	0	562.43589.con.0076	4	CAG	TAGAACAG	190.466	9	0.9	Insertion									Transposase InsH for insertion sequence element IS5	intergenic_region	MODIFIER
1							PE7		1	12.5									0	0									0	0	562.43589.con.0076	5	AGGGTTC	TGGAGCCATAGAACAGGGTTC	97.5186	7	0.7	Insertion									Transposase InsH for insertion sequence element IS5	intergenic_region	MODIFIER
2									0	0					PE13				1	12.5			PE19						1	12.5	562.43589.con.0077	1	AGTCTTCC	CGAGTAAGTCTTCC	55.1322	3	0.39	Insertion									Mobile element protein
1				PE4					1	12.5									0	0									0	0	562.43589.con.0077	3	TCTTCC	CAGGGTTGCAGCCACGAGTGAGTCTTCC	19.6695	2	0.33	Insertion	agggaagac	agGGAAGACTCACTCGTGGCTGCAACCCTGc			yes	fig|562.43589.peg.4473	Mobile element protein			frameshift_variant	HIGH
17	PE1	PE2	PE3	PE4	PE5	PE6		PE8	7	87.5	PE9		PE11		PE13		PE15	PE16	5	62.5	PE17	PE18		PE20	PE21			PE24	5	62.5	562.43589.con.0077	346	T	C	3279.07	68.1	0.67	Nonsyn	att	Gtt	700A>G	Ile234Val		fig|562.43589.peg.4473	Mobile element protein			missense_variant	MODERATE
17	PE1	PE2	PE3	PE4	PE5	PE6	PE7	PE8	8	100	PE9		PE11		PE13	PE14	PE15	PE16	6	75	PE17			PE20	PE21				3	37.5	562.43589.con.0077	473	G	A	3004.05	66.5	0.63	Synon	aac	aaT	573C>T	Asn191Asn		fig|562.43589.peg.4473	Mobile element protein			synonymous_variant	LOW
10	PE1	PE2	PE3	PE4	PE5	PE6		PE8	7	87.5				PE12		PE14			2	25	PE17								1	12.5	562.43589.con.0077	824	C	T	2244.39	71	0.68	Synon	cgg	cgA	222G>A	Arg74Arg		fig|562.43589.peg.4473	Mobile element protein			synonymous_variant	LOW
13	PE1	PE2	PE3	PE4	PE5	PE6		PE8	7	87.5			PE11	PE12	PE13	PE14			4	50	PE17					PE23			2	25	562.43589.con.0077	839	G	A	2298.57	59.5	0.65	Synon	atc	atT	207C>T	Ile69Ile		fig|562.43589.peg.4473	Mobile element protein			synonymous_variant	LOW
1									0	0					PE13				1	12.5									0	0	562.43589.con.0078	1026	CGTT	CGTTGTAGCAAAA	30.766	2	0.29	Insertion	ggcgtt	ggCGTTGTAGCAAAA				fig|562.43589.peg.4474	Translation elongation factor Tu
1				PE4					1	12.5									0	0									0	0	562.43589.con.0078	154	GCG	GCT	144.363	22	0.58	Synon	gcg	GCT	156G>T	Ala52Ala		fig|562.43589.peg.4474	Translation elongation factor Tu			synonymous_variant	LOW
9			PE3				PE7	PE8	3	37.5	PE9	PE10	PE11			PE14	PE15		5	62.5		PE18							1	12.5	562.43589.con.0078	156	G	T	371.506	17.6	0.6	Synon	gcg	gcT	156G>T	Ala52Ala		fig|562.43589.peg.4474	Translation elongation factor Tu			synonymous_variant	LOW
10	PE1		PE3			PE6	PE7		4	50	PE9		PE11				PE15	PE16	4	50				PE20	PE21				2	25	562.43589.con.0078	462	T	C	817.954	36.1	0.61	Synon	tat	taC	462T>C	Tyr154Tyr		fig|562.43589.peg.4474	Translation elongation factor Tu			synonymous_variant	LOW
1				PE4					1	12.5									0	0									0	0	562.43589.con.0079	410	G	A	86.1758	7	1	Synon	agc	agT	561C>T	Ser187Ser		fig|562.43589.peg.4475	core protein			synonymous_variant	LOW
1				PE4					1	12.5									0	0									0	0	562.43589.con.0079	488	GGTG	AGTC	13.8767	5	0.38	Synon	cgcacc	cgGACT	480CACC>GACT	ArgThr160ArgThr		fig|562.43589.peg.4475	core protein			synonymous_variant	LOW
3				PE4					1	12.5									0	0			PE19		PE21				2	25	562.43589.con.0079	541	CC	CT	363.63	20.7	0.72	Synon	acggag	acAGag	429G>A	Thr143Thr		fig|562.43589.peg.4475	core protein			synonymous_variant	LOW
16		PE2	PE3		PE5	PE6	PE7		5	62.5			PE11		PE13	PE14	PE15	PE16	5	62.5	PE17	PE18		PE20		PE22	PE23	PE24	6	75	562.43589.con.0079	542	C	T	394.002	19.5	0.66	Synon	acg	acA	429G>A	Thr143Thr		fig|562.43589.peg.4475	core protein			synonymous_variant	LOW
3				PE4					1	12.5									0	0	PE17						PE23		2	25	562.43589.con.0080	747	G	A	89.3248	18.3	0.72	Synon	gac	gaT	138C>T	Asp46Asp		fig|562.43589.peg.4476	H repeat-associated protein, YhhI family			synonymous_variant	LOW
3				PE4					1	12.5									0	0	PE17						PE23		2	25	562.43589.con.0080	756	G	A	61.7566	18	0.71	Synon	cac	caT	129C>T	His43His		fig|562.43589.peg.4476	H repeat-associated protein, YhhI family			synonymous_variant	LOW
1									0	0									0	0			PE19						1	12.5	562.43589.con.0081	1	TGACAACG	GGAATGACAACG	98.7517	4	0.67	Insertion									core protein
1									0	0									0	0							PE23		1	12.5	562.43589.con.0081	846	A	T	11.5683	2	0.33	Nonsyn	aaa	aTa	845A>T	Lys282Ile		fig|562.43589.peg.4477	core protein			missense_variant	MODERATE
1	PE1								1	12.5									0	0									0	0	562.43589.con.0082	1	CTCTCCCGCA	GGCCCGCTGCCGTTCATCCTCTCCCGCA	24.0004	2	0.33	Insertion	ctctcccgcacctacagcagttaccggaca	GGCCCGCTGCCGTTCATCCTCTCCCGCAcctacagcagttaccggaca	1_2insGGCCCGCTGCCGTTCATC	Leu1_Ser2insGlyProLeuProPheIleLeu		fig|562.43589.peg.4478	core protein			inframe_insertion	MODERATE
1									0	0								PE16	1	12.5									0	0	562.43589.con.0082	2	TCTCCCGCA	TGCCGTTCATTCTCTCCCGCA	23.9267	2	0.18	Insertion	ctctcccgcacctacagcagttac	cTGCCGTTCATTCTCTCCCGCAcctacagcagttac	3_4insGCCGTTCATTCT	Leu1_Ser2insLeuProPheIleLeu		fig|562.43589.peg.4478	core protein			disruptive_inframe_insertion	MODERATE
1							PE7		1	12.5									0	0									0	0	562.43589.con.0082	505	T	G	51.4884	9	0.53	Nonsyn	tgg	Ggg	505T>G	Trp169Gly		fig|562.43589.peg.4478	core protein			missense_variant	MODERATE
4									0	0					PE13				1	12.5	PE17					PE22	PE23		3	37.5	562.43589.con.0082	735	C	A	152.962	8.5	0.62	Synon	ccc	ccA	735C>A	Pro245Pro		fig|562.43589.peg.4478	core protein			synonymous_variant	LOW
1	PE1								1	12.5									0	0									0	0	562.43589.con.0082	744	ACTGGCG	ACTGGCGGTGGTGTAT	32.4945	2	0.33	Insertion	gaactggcg	gaACTGGCGGTGGTGTAT				fig|562.43589.peg.4478	core protein
2									0	0					PE13				1	12.5			PE19						1	12.5	562.43589.con.0082	745	CTGGCGG	CTGGCGGTGGTGTATGACCG	23.8926	4	0.54	Insertion	ctggcg	CTGGCGGTGGTGTATGACCG			yes	fig|562.43589.peg.4478	core protein				MODIFIER
1									0	0								PE16	1	12.5									0	0	562.43589.con.0082	746	TGGCGG	TGGCGGCGGTGTATGACCGCAG	23.9181	2	0.22	Insertion	ctggcg	cTGGCGGCGGTGTATGACCGCAG			yes	fig|562.43589.peg.4478	core protein				MODIFIER
1								PE8	1	12.5									0	0									0	0	562.43589.con.0082	747	GGCGG	GGCGGCGGTGTATGACCGCAG	23.9424	2	0.33	Insertion	ctggcg	ctGGCGGCGGTGTATGACCGCAG			yes	fig|562.43589.peg.4478	core protein				MODIFIER
2	PE1								1	12.5				PE12					1	12.5									0	0	562.43589.con.0083	699	CGCCCATA	CGCCCATACCCGACGATAAC	107.35	2.5	0.32	Insertion	tag	tGTTATCGTCGGGTATGGGCG				fig|562.43589.peg.4479	Transposase InsD for insertion element IS2				MODIFIER
7			PE3						1	12.5							PE15	PE16	2	25					PE21	PE22	PE23	PE24	4	50	562.43589.con.0083	701	CCC	CCCATACCCGACG	85.3744	4.1	0.53	Insertion	tgggcgctgcttcgc	tCGTCGGGTATGGGcgctgcttcgc	1_2insCGTCGGGTAT	Trp1_Ala2fs	yes	fig|562.43589.peg.4479	Transposase InsD for insertion element IS2			frameshift_variant	HIGH
3					PE5				1	12.5									0	0	PE17			PE20					2	25	562.43589.con.0084	134	T	C	22.8436	14.3	0.67										tRNA-Glu-TTC	intergenic_region	MODIFIER
5	PE1	PE2			PE5				3	37.5									0	0	PE17			PE20					2	25	562.43589.con.0084	158	AG	GA	90.9787	24.2	0.61										tRNA-Glu-TTC	intergenic_region	MODIFIER
6	PE1	PE2			PE5				3	37.5			PE11						1	12.5	PE17			PE20					2	25	562.43589.con.0084	168	A	T	172.886	22.2	0.67										tRNA-Glu-TTC	intergenic_region	MODIFIER
23	PE1	PE2	PE3	PE4	PE5	PE6	PE7	PE8	8	100		PE10	PE11	PE12	PE13	PE14	PE15	PE16	7	87.5	PE17	PE18	PE19	PE20	PE21	PE22	PE23	PE24	8	100	562.43589.con.0084	393	T	C	898.705	26	0.76									tRNA-Glu-TTC		intergenic_region	MODIFIER
1									0	0									0	0				PE20					1	12.5	562.43589.con.0084	481	T	C	64.1694	5	0.83									tRNA-Glu-TTC		intergenic_region	MODIFIER
2						PE6			1	12.5		PE10							1	12.5									0	0	562.43589.con.0085	635	CATTACC	CATTACCTAAAC	22.2349	3	0.39	Insertion								IS1 protein InsB			MODIFIER
2	PE1								1	12.5					PE13				1	12.5									0	0	562.43589.con.0085	636	ATTACC	ATTACCGACAATACG	78.6393	2	0.31	Insertion								IS1 protein InsB			MODIFIER
1									0	0									0	0							PE23		1	12.5	562.43589.con.0087	100	CT	CC	811.038	32	0.94	Synon	ctagaa	ctGGaa	429A>G	Leu143Leu		fig|562.43589.peg.4481	Phage head, terminase subunit Nu1			synonymous_variant	LOW
21	PE1	PE2	PE3	PE4	PE5	PE6	PE7	PE8	8	100	PE9	PE10	PE11	PE12	PE13		PE15	PE16	7	87.5	PE17	PE18	PE19		PE21	PE22	PE24		6	75	562.43589.con.0087	101	T	C	1050.51	28.9	0.99	Synon	cta	ctG	429A>G	Leu143Leu		fig|562.43589.peg.4481	Phage head, terminase subunit Nu1			synonymous_variant	LOW
1			PE3						1	12.5									0	0									0	0	562.43589.con.0087	2	ATAT	CGATATAT	56.2093	4	0.67	Insertion	gaatat	gaATATATCG			yes	fig|562.43589.peg.4481	Phage head, terminase subunit Nu1			frameshift_variant	HIGH
14				PE4	PE5		PE7	PE8	4	50		PE10				PE14		PE16	3	37.5	PE17	PE18	PE19		PE21	PE22	PE23	PE24	7	87.5	562.43589.con.0087	245	G	A	210.043	27.5	0.62	Synon	gac	gaT	285C>T	Asp95Asp		fig|562.43589.peg.4481	Phage head, terminase subunit Nu1			synonymous_variant	LOW
5						PE6		PE8	2	25	PE9						PE15		2	25				PE20					1	12.5	562.43589.con.0087	321	A	C	281.257	20.8	0.64	Nonsyn	ctg	cGg	209T>G	Leu70Arg		fig|562.43589.peg.4481	Phage head, terminase subunit Nu1			missense_variant	MODERATE
5						PE6		PE8	2	25	PE9						PE15		2	25				PE20					1	12.5	562.43589.con.0087	335	C	T	12.2162	18.6	0.6	Synon	gag	gaA	195G>A	Glu65Glu		fig|562.43589.peg.4481	Phage head, terminase subunit Nu1			synonymous_variant	LOW
7						PE6		PE8	2	25						PE14	PE15	PE16	3	37.5			PE19	PE20					2	25	562.43589.con.0087	387	T	C	15.4741	19.9	0.57	Nonsyn	aaa	aGa	143A>G	Lys48Arg		fig|562.43589.peg.4481	Phage head, terminase subunit Nu1			missense_variant	MODERATE
8						PE6		PE8	2	25	PE9					PE14	PE15	PE16	4	50			PE19	PE20					2	25	562.43589.con.0087	392	G	A	105.274	17.1	0.6	Synon	gtc	gtT	138C>T	Val46Val		fig|562.43589.peg.4481	Phage head, terminase subunit Nu1			synonymous_variant	LOW
1									0	0									0	0						PE22			1	12.5	562.43589.con.0087	526	CCA	CCATTGCACA	35.1118	2	0.33	Insertion	atggaagtcaac	aTGTGCAATGGaagtcaac	1_2insTGTGCAA	Met1_Glu2fs	yes	fig|562.43589.peg.4481	Phage head, terminase subunit Nu1			frameshift_variant	HIGH
1									0	0									0	0						PE22			1	12.5	562.43589.con.0087	531	G	C	78.162	6	1									Phage head, terminase subunit Nu1
5			PE3	PE4					2	25									0	0	PE17		PE19					PE24	3	37.5	562.43589.con.0090	1	GTTGCG	GTTTCACTTCAGAGTTGCG	40.5455	4	0.4	Insertion									tRNA-Ala-TGC	intergenic_region	MODIFIER
2									0	0	PE9								1	12.5								PE24	1	12.5	562.43589.con.0090	135	T	C	101.81	10	0.68										tRNA-Ala-TGC	intergenic_region	MODIFIER
1									0	0									0	0							PE23		1	12.5	562.43589.con.0090	2	TTGCGA	CAGAGTTGCGA	44.3294	2	0.33	Insertion									tRNA-Ala-TGC	intergenic_region	MODIFIER
1									0	0		PE10							1	12.5									0	0	562.43589.con.0090	35	CG	CA	246.156	12	0.67										tRNA-Ala-TGC	intergenic_region	MODIFIER
4	PE1	PE2							2	25				PE12					1	12.5								PE24	1	12.5	562.43589.con.0090	36	G	A	130.831	6.5	0.57										tRNA-Ala-TGC	intergenic_region	MODIFIER
1								PE8	1	12.5									0	0									0	0	562.43589.con.0090	383	AGCACT	AGCACTTCAAAG	45.4752	3	0.38	Insertion								tRNA-Ile-GAT			MODIFIER
1									0	0					PE13				1	12.5									0	0	562.43589.con.0090	384	GCACT	GCACTGCAAAGTACGCT	25.5976	2	0.33	Insertion								tRNA-Ile-GAT			MODIFIER
3	PE1								1	12.5		PE10							1	12.5			PE19						1	12.5	562.43589.con.0093	1	AAAAATC	GAAGAGAAAAAAATC	14.5431	2.3	0.31	Insertion									hypothetical protein	intergenic_region	MODIFIER
3									0	0							PE15		1	12.5					PE21			PE24	2	25	562.43589.con.0093	203	G	A	63.8935	7.3	0.59	Synon	ttc	ttT	108C>T	Phe36Phe		fig|562.43589.peg.4484	hypothetical protein			synonymous_variant	LOW
15	PE1	PE2				PE6		PE8	4	50	PE9	PE10		PE12	PE13		PE15		5	62.5		PE18	PE19		PE21	PE22	PE23	PE24	6	75	562.43589.con.0093	68	C	A	293.098	14.7	0.69										hypothetical protein	intergenic_region	MODIFIER
2				PE4					1	12.5						PE14			1	12.5									0	0	562.43589.con.0093	71	TGA	TA	36.1214	4	0.5	Deletion									hypothetical protein	intergenic_region	MODIFIER
2				PE4					1	12.5						PE14			1	12.5									0	0	562.43589.con.0093	76	GCCGCGT	GCGCGT	30.3197	4	0.5	Deletion									hypothetical protein	intergenic_region	MODIFIER
2									0	0		PE10			PE13				2	25									0	0	562.43589.con.0094	2	CTGCGT	GTACGCCGTCTGCGT	52.5471	3	0.45	Insertion									Transposase InsI for insertion sequence element IS30	intergenic_region	MODIFIER
Need Notes:
1. # samples: number samples has a specific SNP
2. PE#: sample ID
3. % mutation: mutation rate within a generation
